# Supplementary material for: Patient navigation programs in Alberta, Canada: an environmental scan
Source: PubMed Central journal article supplement — CMAJ Open. 2021 Sep 7;9(3):E841–7. doi: 10.9778/cmajo.20210004 (PMC8428899; doi:10.9778/cmajo.20210004), 2021-09-07
Supplement: 2021-0004-3-at.pdf [file 2021-0004-3-at.pdf]

**Appendix 3: Categorization of patient navigation by mode of delivery**

| Program                                                                                         | Individual Patient Navigators |              |         |          | Web-Based Tools To Allow Self-Navigation |              |         |          | Structural or Organizational Changes |              |         |          |
|-------------------------------------------------------------------------------------------------|-------------------------------|--------------|---------|----------|------------------------------------------|--------------|---------|----------|--------------------------------------|--------------|---------|----------|
|                                                                                                 | Episodic                      | Longitudinal | General | Subgroup | Episodic                                 | Longitudinal | General | Subgroup | Episodic                             | Longitudinal | General | Subgroup |
| <b>Alberta Health Services</b>                                                                  |                               |              |         |          |                                          |              |         |          |                                      |              |         |          |
| Aboriginal Hospital Liaison                                                                     |                               | ✓            |         | ✓        |                                          |              |         |          |                                      |              |         |          |
| Access Addictions and Mental Health-Edmonton                                                    |                               | ✓            | ✓       |          |                                          |              |         |          |                                      |              |         |          |
| Access Mental Health-Calgary                                                                    | ✓                             |              | ✓       |          |                                          |              |         |          |                                      |              |         |          |
| Adolescent and Young Adults Program                                                             |                               | ✓            |         | ✓        | ✓                                        |              |         | ✓        |                                      |              |         |          |
| Alberta Healthy Living Program Assistance                                                       |                               |              |         |          |                                          |              |         |          | ✓                                    |              |         | ✓        |
| Alberta Thoracic Oncology Program                                                               | ✓                             |              |         | ✓        |                                          |              |         |          |                                      | ✓            |         | ✓        |
| Anticoagulation Management Services                                                             |                               | ✓            |         | ✓        |                                          |              |         |          |                                      | ✓            |         | ✓        |
| Autism Spectrum Diagnostic Clinic – Pediatric Navigation Services                               |                               | ✓            |         | ✓        |                                          |              |         |          |                                      |              |         |          |
| Bonnyville Child and Adolescent Mental Health Program                                           |                               | ✓            |         | ✓        |                                          |              |         |          |                                      |              |         |          |
| Breast Health Program                                                                           |                               | ✓            |         | ✓        |                                          |              |         |          |                                      | ✓            |         | ✓        |
| Calgary Corrections Transitions Team                                                            |                               | ✓            |         | ✓        |                                          |              |         |          |                                      |              |         |          |
| CancerControl Alberta Drug Access Coordinator                                                   |                               | ✓            |         | ✓        |                                          |              |         |          |                                      |              |         |          |
| Cardiac Navigation - North                                                                      | ✓                             |              |         | ✓        |                                          |              |         |          |                                      |              |         |          |
| Cardiac Navigation – South                                                                      | ✓                             |              |         | ✓        |                                          |              |         |          |                                      |              |         |          |
| Child and Adolescent Addiction and Mental Health Psychiatric Program (CAAMHPP) Outreach Service |                               | ✓            |         | ✓        |                                          |              |         |          |                                      |              |         |          |

| Program                                                                                        | Individual Patient Navigators |              |         |          | Web-Based Tools To Allow Self-Navigation |              |         |          | Structural or Organizational Changes |              |         |          |
|------------------------------------------------------------------------------------------------|-------------------------------|--------------|---------|----------|------------------------------------------|--------------|---------|----------|--------------------------------------|--------------|---------|----------|
|                                                                                                | Episodic                      | Longitudinal | General | Subgroup | Episodic                                 | Longitudinal | General | Subgroup | Episodic                             | Longitudinal | General | Subgroup |
| Child and Adolescent Addiction and Mental Health Psychiatric Program (CAAMHPP) Network Liaison | ✓                             |              |         | ✓        |                                          |              |         |          |                                      |              |         |          |
| Child and Adolescent Addiction and Mental Health Psychiatric Program (CAAMHPP) School Liaison  | ✓                             |              |         | ✓        |                                          |              |         |          |                                      |              |         |          |
| Child and Adolescent Addiction and Mental Health Program Psychology                            | ✓                             |              |         | ✓        |                                          |              |         |          |                                      |              |         |          |
| Child Development Services                                                                     |                               |              |         |          |                                          |              |         |          | ✓                                    |              |         | ✓        |
| Children's Rehabilitation Services Coordinated Intake Program                                  |                               | ✓            |         | ✓        |                                          |              |         |          |                                      |              |         |          |
| Clinical Breast Health Program                                                                 | ✓                             |              |         | ✓        |                                          |              |         |          | ✓                                    |              |         | ✓        |
| Cochrane Community Health Centre Program Navigation                                            | ✓                             |              | ✓       |          |                                          |              |         |          |                                      |              |         |          |
| Community Care Access                                                                          | ✓                             |              | ✓       |          |                                          |              |         |          | ✓                                    |              | ✓       | ✓        |
| Comprehensive Breast Cancer Program                                                            |                               |              |         |          |                                          |              |         |          | ✓                                    |              |         | ✓        |
| Division Team Transition Away from Legal System                                                | ✓                             |              |         | ✓        |                                          |              |         |          |                                      |              |         |          |
| Family Support Specialist                                                                      | ✓                             |              |         | ✓        |                                          |              |         |          |                                      |              |         |          |
| Foothills Children's Wellness Network and Children's Rehabilitation Navigator                  |                               | ✓            | ✓       |          | ✓                                        |              | ✓       |          |                                      |              |         |          |
| Health Link                                                                                    | ✓                             | ✓            | ✓       |          | ✓                                        |              | ✓       |          |                                      |              |         |          |
| Home Care Case Management                                                                      |                               | ✓            | ✓       |          |                                          |              |         |          |                                      |              |         |          |
| Integrated Support and Facility Living                                                         |                               | ✓            |         | ✓        |                                          |              |         |          |                                      |              |         |          |

| Program                                                                        | Individual Patient Navigators |              |         |          | Web-Based Tools To Allow Self-Navigation |              |         |          | Structural or Organizational Changes |              |         |          |
|--------------------------------------------------------------------------------|-------------------------------|--------------|---------|----------|------------------------------------------|--------------|---------|----------|--------------------------------------|--------------|---------|----------|
|                                                                                | Episodic                      | Longitudinal | General | Subgroup | Episodic                                 | Longitudinal | General | Subgroup | Episodic                             | Longitudinal | General | Subgroup |
| Medical Assistance in Dying (MAID)                                             |                               | ✓            | ✓       |          |                                          |              |         |          |                                      |              |         |          |
| NDD Integrated Brain Health Initiative                                         |                               | ✓            |         | ✓        |                                          |              |         |          |                                      |              |         |          |
| NICU Hematology Oncology Transition Nurse                                      |                               | ✓            |         | ✓        |                                          |              |         |          |                                      |              |         |          |
| Northern Alberta Renal Program                                                 |                               | ✓            |         | ✓        |                                          |              |         |          |                                      | ✓            |         | ✓        |
| Not Criminally Responsible (NCR) Rehabilitation Team - Transition to Community |                               | ✓            |         | ✓        |                                          |              |         |          |                                      | ✓            |         | ✓        |
| Partners for Better Health                                                     |                               | ✓            |         | ✓        |                                          |              |         |          |                                      |              |         |          |
| Rapid Response Complex Needs – Pediatric Navigation Services                   |                               | ✓            |         | ✓        |                                          |              |         |          |                                      |              |         |          |
| Recreation and Aquatic Volunteer Service Specialized Rehabilitation Navigator  | ✓                             |              |         | ✓        |                                          |              |         |          |                                      |              |         |          |
| Rural Community Cancer Patient Navigator                                       |                               | ✓            |         | ✓        |                                          |              |         |          |                                      |              |         |          |
| Surveillance and Surgery Clinic – Pediatric Navigation Services                |                               | ✓            |         | ✓        |                                          |              |         |          |                                      |              |         |          |
| Traditional Wellness Counsellors                                               |                               | ✓            |         | ✓        |                                          |              |         |          |                                      |              |         |          |
| Transition Services                                                            | ✓                             |              |         | ✓        |                                          |              |         |          |                                      |              |         |          |
| Well on your Way: Youth in Transition                                          |                               | ✓            |         | ✓        | ✓                                        |              |         | ✓        |                                      |              |         |          |
| <b>Primary Care Networks</b>                                                   |                               |              |         |          |                                          |              |         |          |                                      |              |         |          |
| Camrose PCN                                                                    |                               | ✓            | ✓       |          |                                          |              |         |          |                                      |              |         |          |
| Edmonton PCN- Chronic Disease Management                                       | ✓                             |              |         | ✓        |                                          |              |         |          |                                      |              |         |          |
| Grande Cache PCN                                                               |                               | ✓            |         | ✓        |                                          |              |         |          |                                      |              |         |          |
| Kalyna PCN                                                                     |                               |              |         |          |                                          |              |         |          |                                      | ✓            | ✓       |          |

| Program                                     | Individual Patient Navigators |              |         |          | Web-Based Tools To Allow Self-Navigation |              |         |          | Structural or Organizational Changes |              |         |          |
|---------------------------------------------|-------------------------------|--------------|---------|----------|------------------------------------------|--------------|---------|----------|--------------------------------------|--------------|---------|----------|
|                                             | Episodic                      | Longitudinal | General | Subgroup | Episodic                                 | Longitudinal | General | Subgroup | Episodic                             | Longitudinal | General | Subgroup |
| Lakeland PCN Social Worker Outreach         |                               | ✓            | ✓       |          |                                          |              |         |          |                                      |              |         |          |
| Northwest PCN- Medical Social Worker        |                               | ✓            | ✓       |          |                                          |              |         |          |                                      |              |         |          |
| Northwest PCN- Perinatal Services           |                               | ✓            |         | ✓        |                                          |              |         |          |                                      |              |         |          |
| Red Deer PCN- Nursing Program               |                               | ✓            | ✓       |          |                                          |              |         |          |                                      |              |         |          |
| Rocky Mountain PCN Nurse Navigator          |                               | ✓            | ✓       |          |                                          |              |         |          |                                      |              |         |          |
| Sherwood Park PCN Mental Health Program     | ✓                             |              |         | ✓        |                                          |              |         |          |                                      |              |         |          |
| Specialist Linkages Program                 |                               | ✓            |         | ✓        |                                          |              |         |          |                                      |              |         |          |
| Wainwright PCN                              | ✓                             |              |         | ✓        |                                          |              |         |          |                                      | ✓            | ✓       |          |
| Wetaskiwin PCN- Mental Health               |                               | ✓            |         | ✓        |                                          |              |         |          |                                      |              |         |          |
| Wetaskiwin PCN- Prenatal and Women's Health |                               | ✓            |         | ✓        |                                          |              |         |          |                                      |              |         |          |
| Wetaskiwin PCN- Targeted Care               |                               | ✓            |         | ✓        |                                          |              |         |          |                                      | ✓            |         | ✓        |
